# Supplementary material for: Investigation of the photocatalytic efficiency of tantalum alkoxy carboxylate-derived Ta2O5 nanoparticles in rhodamine B removal
Source: publisher site journal article supplement (doi:10.3762/bjnano.8.65), 2017-03-13
Supplement: Additional file 1 [file 2190-4286-8-65-S1.pdf]

## **Supporting Information**

for

### **Investigation of the photocatalytic efficiency of tantalum alkoxy carboxylate-derived Ta<sub>2</sub>O<sub>5</sub> nanoparticles in rhodamine B removal**

Subia Ambreen, Mohammad Danish, Narendra D. Pandey and Ashutosh Pandey\*,<sup>§</sup>

Address: Department of Chemistry, Motilal Nehru National Institute of Technology, Allahabad,  
211004, India

Email: Ashutosh Pandey \* - [apandey@mnnit.ac.in](mailto:apandey@mnnit.ac.in)

\* Corresponding author

<sup>§</sup> Phone: +91 9235507541

### **Additional experimental data**

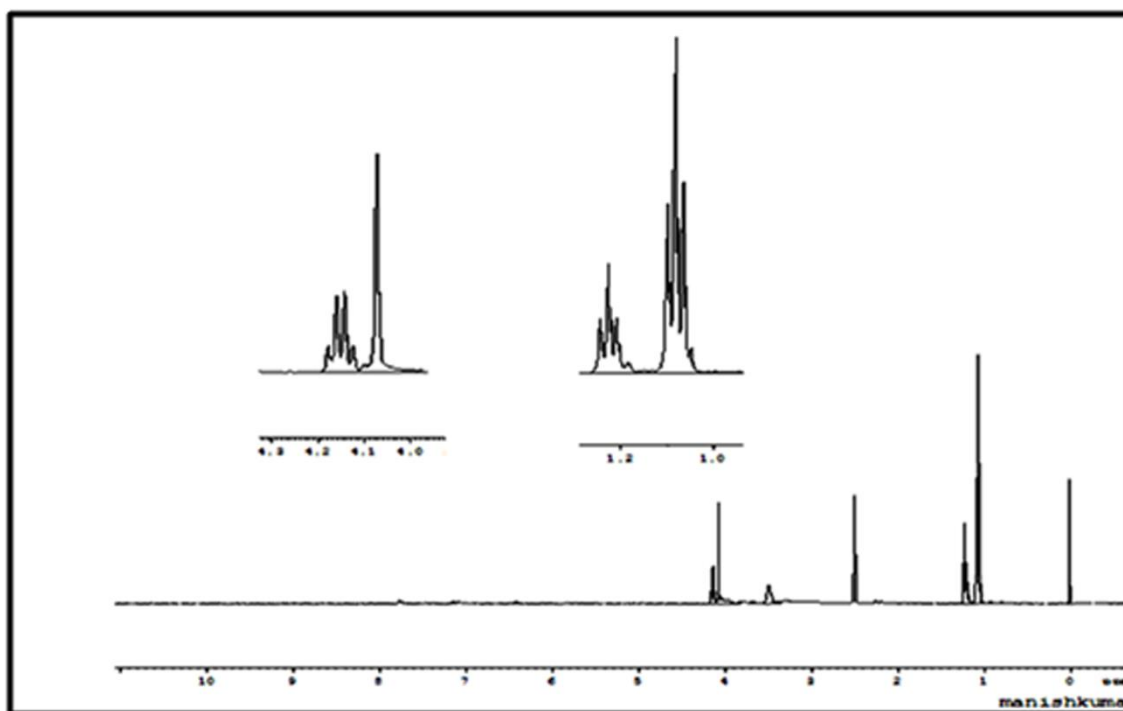

**Figure S1:**  $^1\text{H}$  NMR spectrum of  $\text{Ta}(\text{OEt})_4(\text{OOCCH}_2\text{Cl})$ .

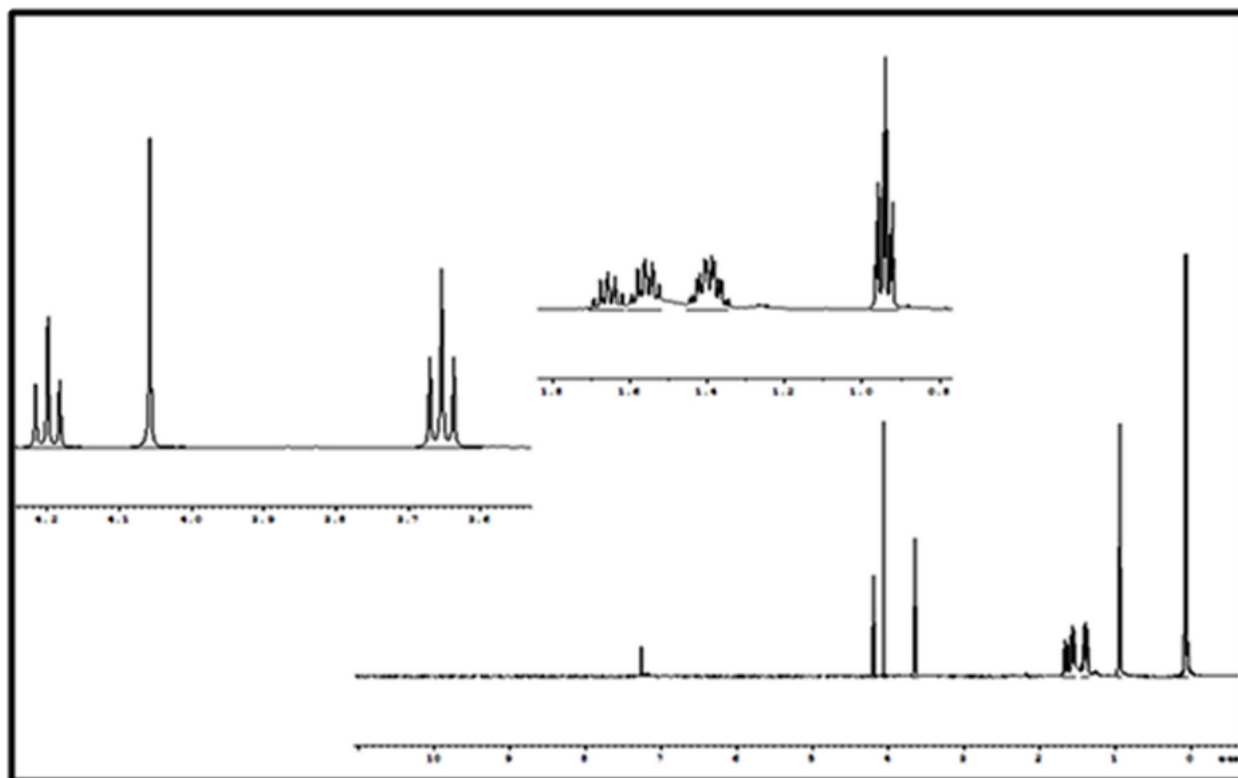

**Figure S2:**  $^1\text{H}$  NMR spectrum of  $\text{Ta}(\text{On-Bu})_4(\text{OOCCH}_2\text{Cl})$ .

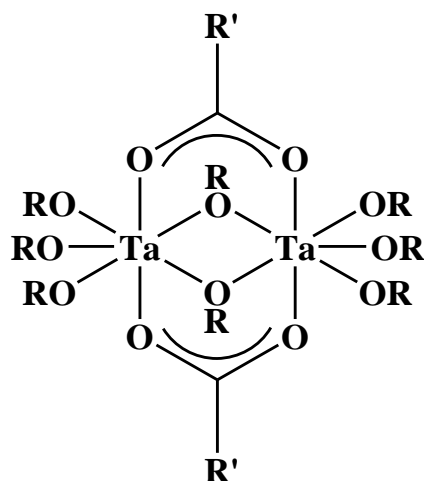

**Figure S3:** Proposed structure of  $\text{Ta}(\text{OR})_4(\text{OOCR}')$ .
